# Supplementary material for: Enhanced interfacial polarization loss induced by hollow engineering of hollow alloyed CoFe-ZIF nanocages/carbon nanofibers for efficient microwave absorption
Source: Royal Society of Chemistry journal article supplement (doi:10.1039/d5qi00118h), 2025-01-01
Supplement: d5qi00118h1.pdf [file d5qi00118h1.pdf]

## Enhanced Interfacial Polarization Loss Induced by Hollow Engineering of Hollow Alloyed CoFe-ZIF Nanocage/Carbon Nanofibers for Efficient Microwave Absorption

Dan Wu<sup>1,2</sup>, Congmin Fan<sup>\*2</sup>, Wusi Luo<sup>\*1</sup>, Yingzhi Jin<sup>2</sup>, Qinchuan He<sup>2</sup>, Yiqun

Wang<sup>\*2</sup>

1. School of Materials Science and Engineering, Hubei University of Automotive Technology, Shiyan, 442002, Hubei, P.R.China

2. College of Materials and Chemistry & Chemical Engineering, Chengdu University of Technology, Chengdu, 610059, Sichuan, P.R.China

*\*Corresponding author: Yiqun Wang, Wusi Luo and Congmin Fan*

*E-mail: wangyiqun17@cdut.edu.cn (Yiqun Wang)*

*luowusi0417@126.com (Wusi Luo)*

*fcongmin@mail.ustc.edu.cn (Congmin Fan)*

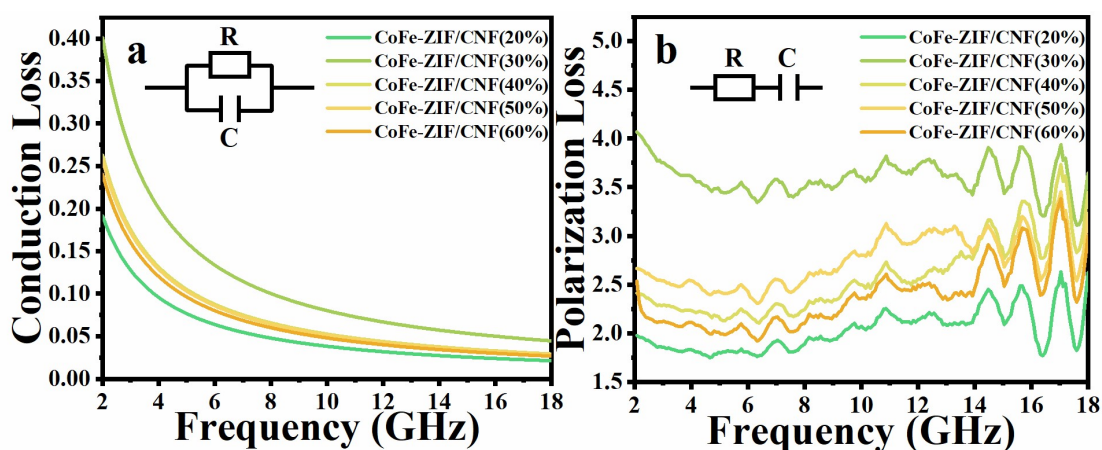

Fig. S1. (a) Conduction loss and (b) polarization loss of CoFe-ZIF/CNFs

The delta function can also be used to calculate the impedance matching degree of the electromagnetic wave absorber surface. The calculation formula is as follows:

$$|\Delta| = |\sin h^2(Kfd) - M| \quad (S1)$$

Where K and M are calculated by the complex permittivity and complex permeability as shown in the following expressions:

$$K = \frac{4\pi\sqrt{\mu' \varepsilon'} \sin \frac{\delta_e + \delta_m}{2}}{ccos \delta_e \cos \delta_m} \quad (S2)$$

$$M = \frac{4\mu' \cos \delta_e \varepsilon' \cos \delta_m}{(\mu' \cos \delta_e - \varepsilon' \cos \delta_m)^2 + \left[ \tan \left( \frac{\delta_m}{2} - \frac{\delta_e}{2} \right) \right]^2 (\mu' \cos \delta_e + \varepsilon' \cos \delta_m)^2}$$

(S3)

When  $|\Delta| < 0.4$ , the electromagnetic wave is absorbed into the material and the loss occurs, indicating that it has excellent impedance matching characteristics.

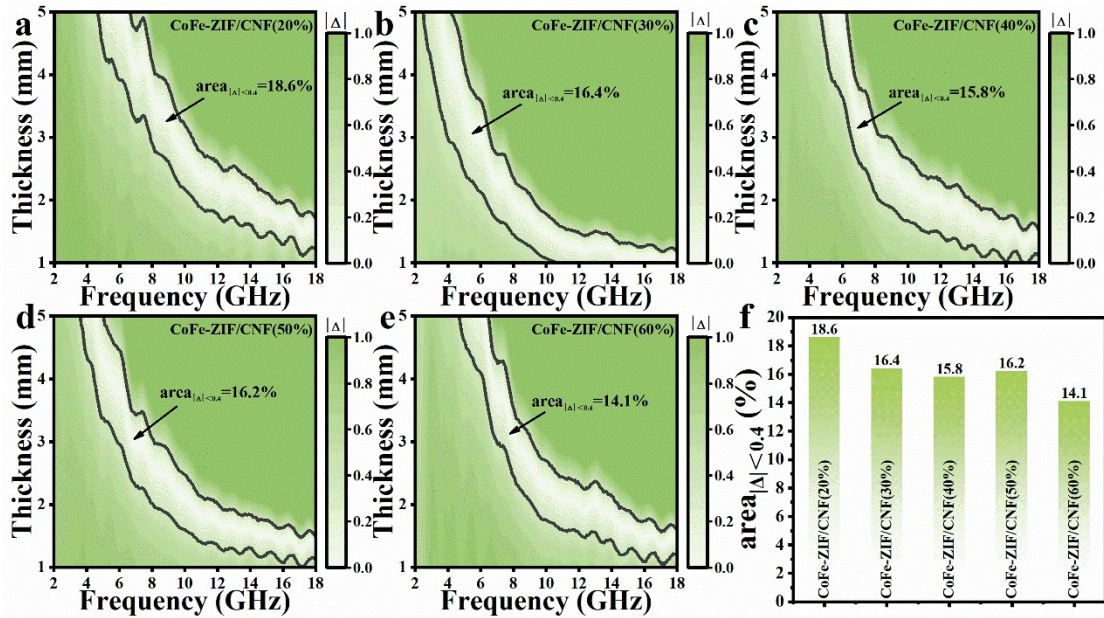

Fig. S2. Calculated delta value maps: (a) CoFe-ZIF/CNF (20%), (b) CoFe-ZIF/CNF (30%), (c) CoFe-ZIF/CNF (40%), (d) CoFe-ZIF/CNF (50%), and (e) CoFe-ZIF/CNF (60%) and (f) delta value of CoFe-ZIF/CNFs

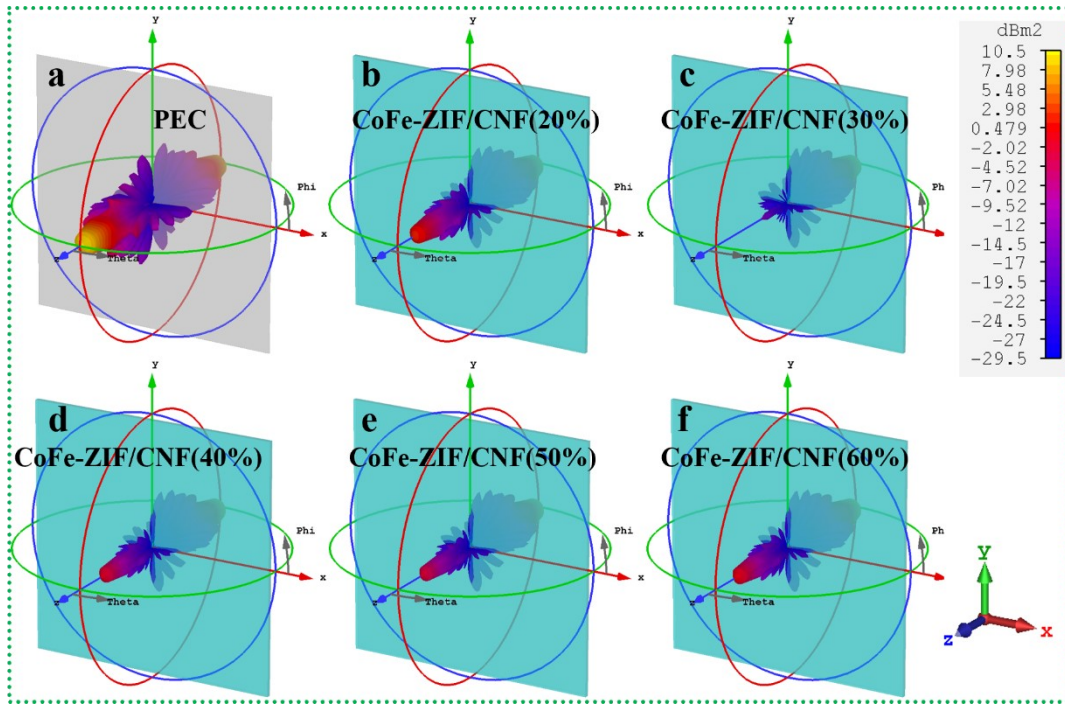

Fig. S3. Results of the far-field simulation of CSTs for PECs and composites: (a) PEC, (b) CoFe-ZIF/CNF (20%), (c) CoFe-ZIF/CNF (30%), (d) CoFe-ZIF/CNF (40%), (e) CoFe-ZIF/CNF (50%), and (f) CoFe-ZIF/CNF (60%)
